# Supplementary figures and images for: Distinct transcriptomic landscapes of cutaneous basal cell carcinomas and squamous cell carcinomas
Source: PubMed Central journal article supplement — Genes Dis. 2019 Oct 19;8(2):181–92. doi: 10.1016/j.gendis.2019.10.004 (PMC8099692; doi:10.1016/j.gendis.2019.10.004), 2019-10-19

**Supplemental Figure 1**

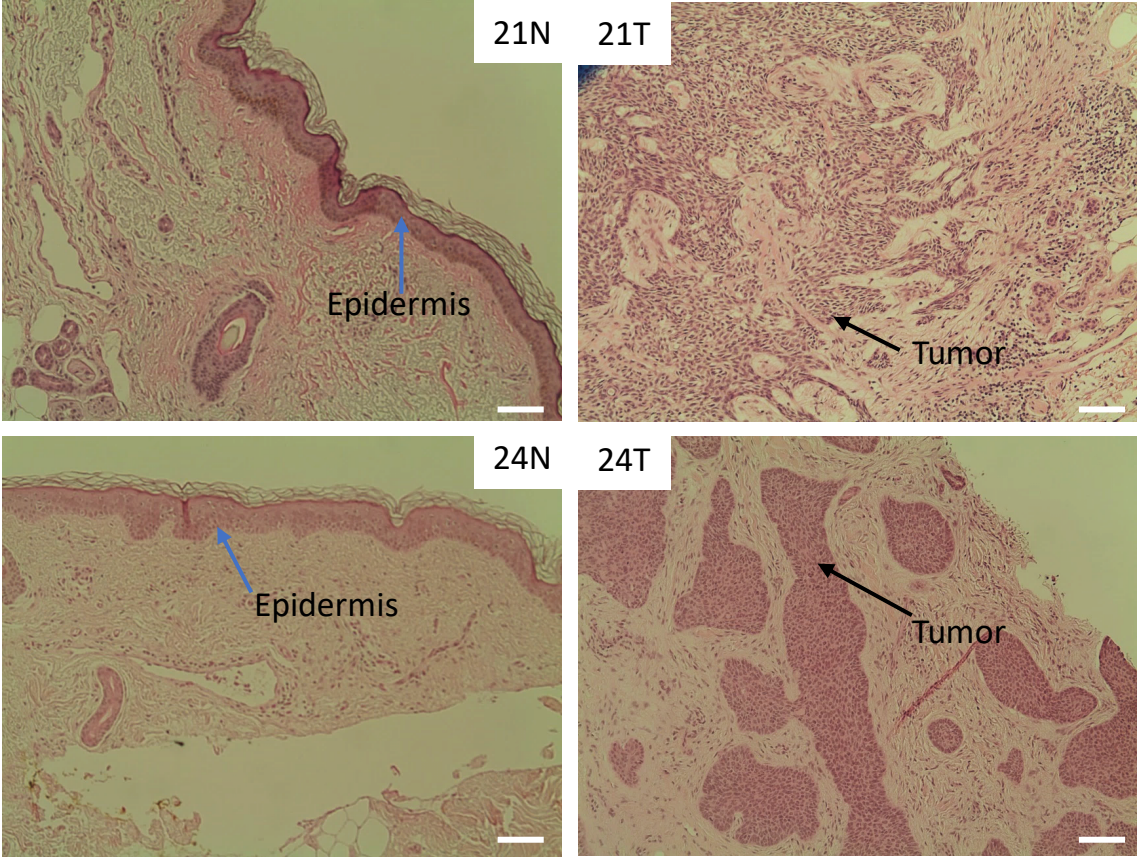

Supplemental Figure 2

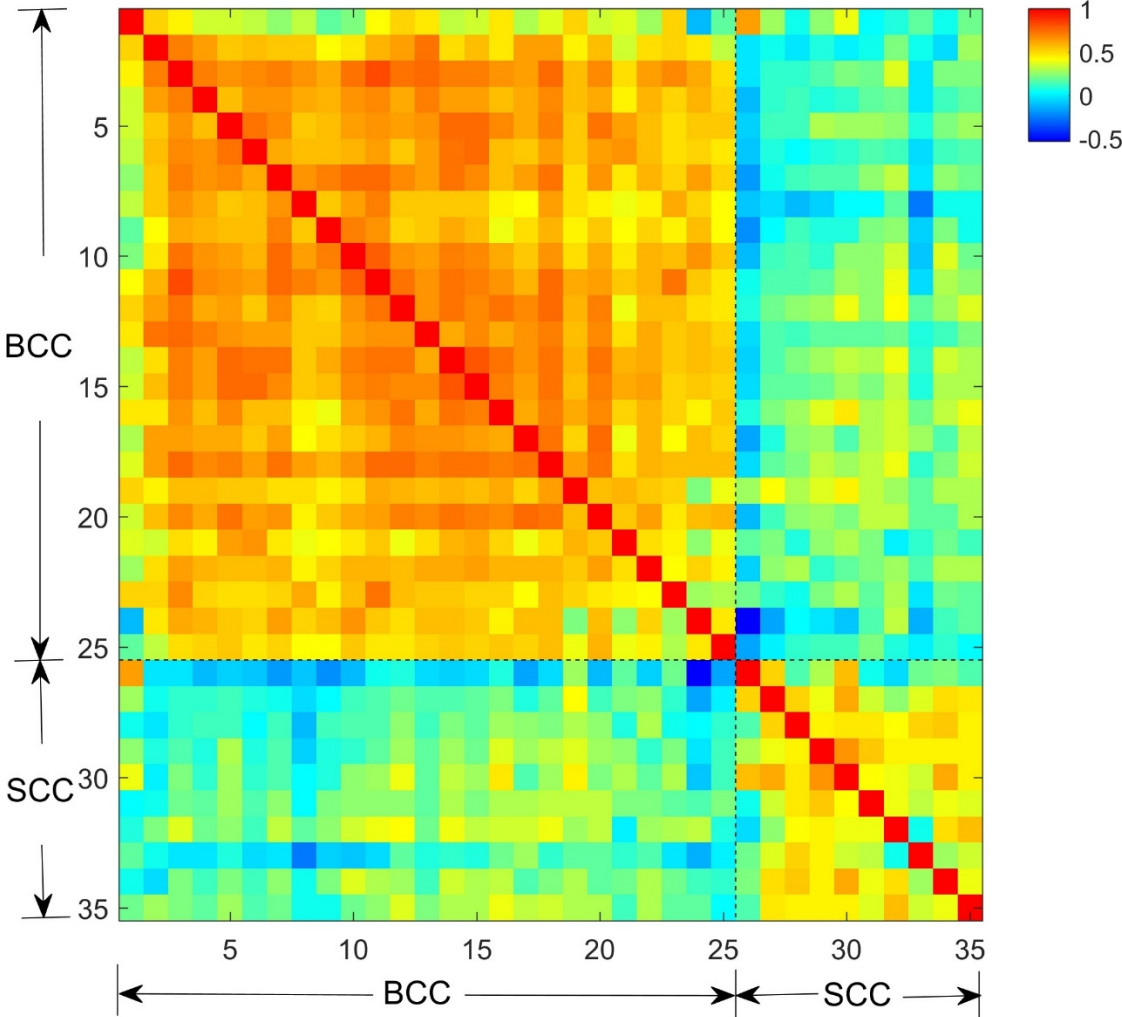

# Supplemental Figure 3

## A

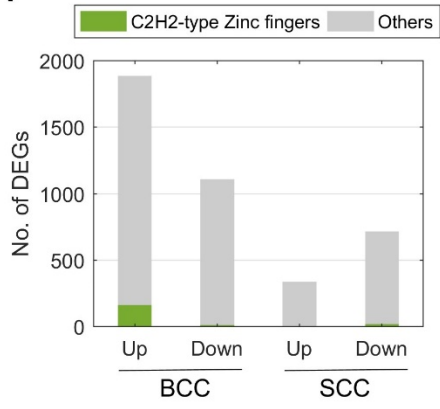

## B

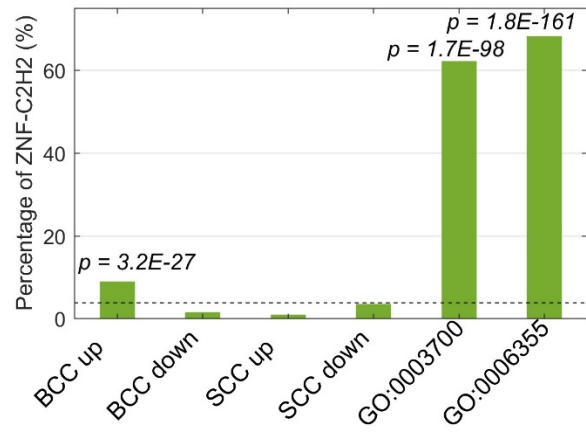

Supplemental Figure 4

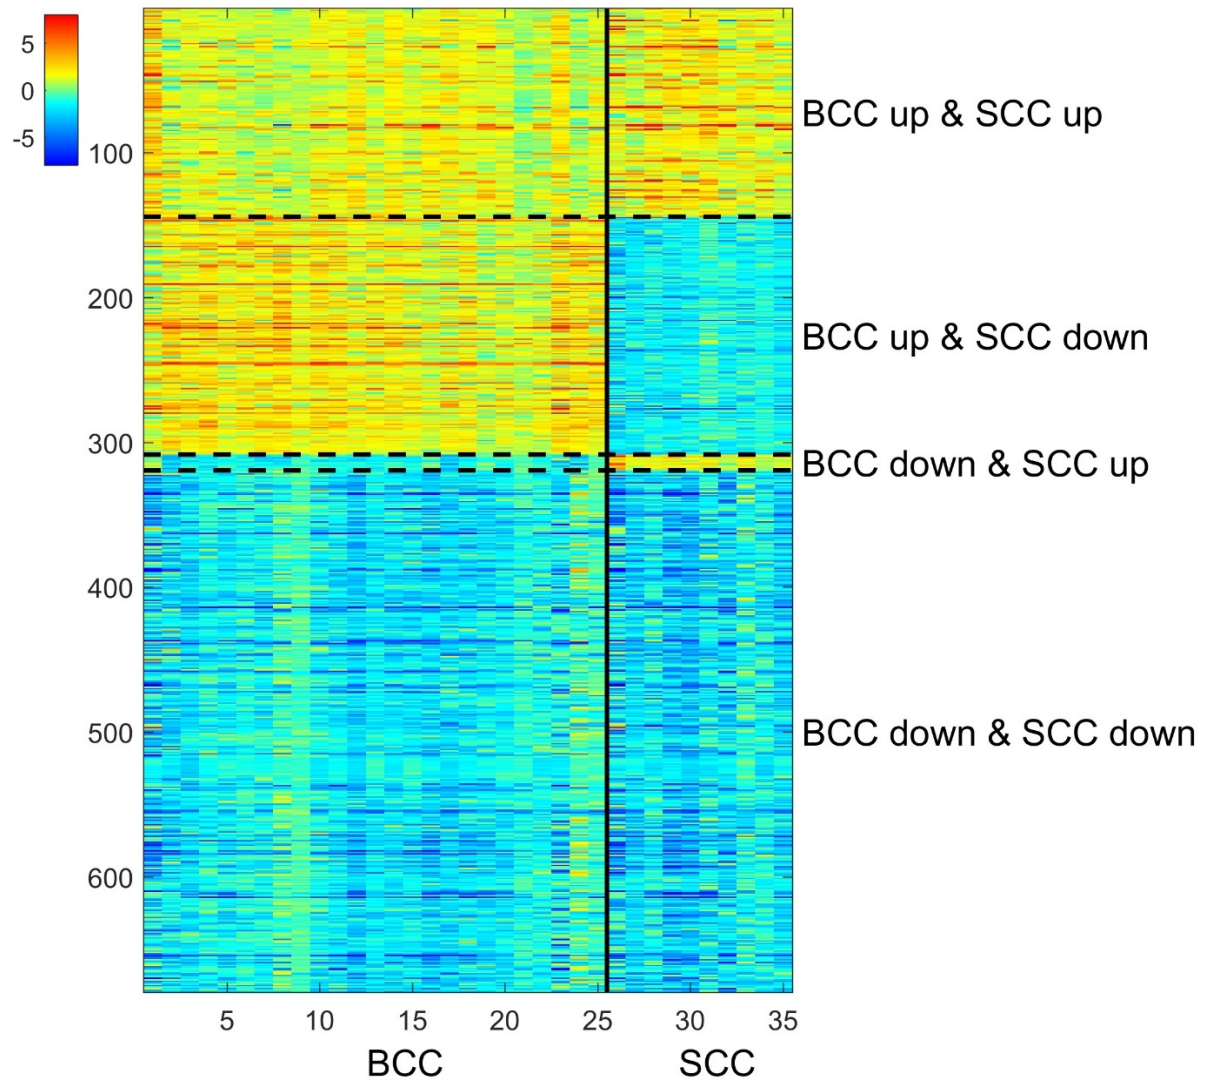

Supplement: mmc1.pdf [file mmc1.pdf]
